# Supplementary material
Source: publisher figshare collection journal article supplement (https://wiley.figshare.com/articles/dataset/_/3568443)
Supplement: Supplementary file 1 [file 1 › appendix-D.pdf]

## D Monte Carlo method for calculating $r(k)$ from a network with heterogeneous states and distributed rates

To numerically determine  $r(k)$  associated with a known network, we use a Monte-Carlo simulation with  $N$  trials in order to estimate a mean  $r(k)$ . The procedure is as follows:

- For each trial, each pool  $i$  is fractionated into sub-states  $j$  as shown in Figure 2. For these simulations we divide the pools into a total number of  $n$  sub-states. The rates  $k_{ij}$  and/or the conversion fractions  $f_{ij}$  associated with each state are randomly assigned. Each state is assigned an equal partitioning  $p_{ij} = 1/n$  because the stochastic information is contained in the random assignment of  $k_{ij}$ .
- For each trial,  $\ell$ , the matrix  $A_\ell$  is generated based on the values of  $k_{ij}$ ,  $p_{ij}$ , and  $f_{ij}$  for each state and each connection.
- We then calculate the eigenvalues and eigenvectors of  $A_\ell$  and use equation (19) to calculate the eigen-decay state partition  $\mathbf{r}_\ell$  for each trial.
- The previous three steps are repeated  $N$  times to generate an ensemble of initial eigen-state vectors  $\mathbf{r}_\ell$ .
- After removing outliers containing degenerate eigenvalues, we divide the  $\ln k$  axis into equally spaced bins of width  $\Delta \ln k$  and sum the weights  $r_i$  in each bin from all trials  $\ell$ . Because the bins are logarithmically-spaced, we estimate the exit rate function in log-rate space  $v(\ln k)$ .  $v(\ln k)$  is related to  $r(k)$  by  $r(k) = v(\ln k) d \ln k / dk$ .
- We then divide the sum by the factor  $N \Delta \ln k$  to provide the estimate

$$\mathbf{v} = \frac{\sum_{\ell=1}^N \mathbf{r}_\ell}{N \Delta \ln k}. \quad (\text{D.1})$$

$\mathbf{v}$  is a discrete approximation of the continuous function  $v(\ln k)$ .
